# Supplementary material for: In situ built nanoconfined Nb2O5 particles in a 3D interconnected Nb2C MXene@rGO conductive framework for high-performance potassium-ion batteries
Source: Royal Society of Chemistry journal article supplement (doi:10.1039/d3qi01775c), 2023-11-10
Supplement: d3qi01775c1.pdf [file d3qi01775c1.pdf]

**In Situ Built Nanoconfined Nb<sub>2</sub>O<sub>5</sub> Particles in 3D Interconnected Nb<sub>2</sub>C  
MXene@rGO Conductive Framework for High-Performance Potassium-Ion  
Batteries**

*Cong Liu,<sup>a,b</sup> Zhitang Fang,<sup>a</sup> Weizhi Kou,<sup>a</sup> Xiaoge Li,<sup>c</sup> Jinhua Zhou,<sup>d</sup> Gang Yang,<sup>d</sup>  
Luming Peng,<sup>a</sup> Xuefeng Guo,<sup>a</sup> Weiping Ding,<sup>a</sup> Wenhua Hou<sup>a\*</sup>*

<sup>a</sup> Key Laboratory of Mesoscopic Chemistry of MOE, School of Chemistry and  
Chemical Engineering, Nanjing University, Nanjing, 210023, P. R. China.

<sup>b</sup> School of Materials Engineering, Jiangsu University of Technology, Changzhou  
213001, P.R. China.

<sup>c</sup> School of Chemistry and Chemical Engineering, Yangzhou University, Yangzhou,  
225009, P. R. China.

<sup>d</sup> Suzhou Key Laboratory of Functional Ceramic Materials, Changshu Institute of  
Technology, Changshu, 215500, P. R. China.

\* Corresponding author.

E-mail address: whou@nju.edu.cn (W. Hou)

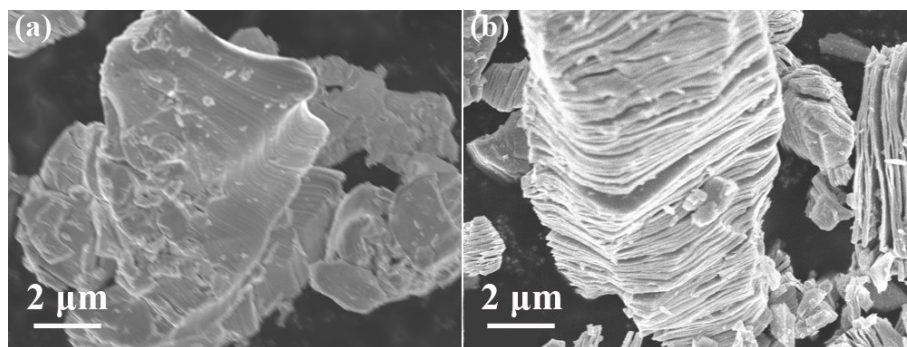

**Figure S1** Typical SEM images of (a) Nb<sub>2</sub>AlC and (b) multi-layered Nb<sub>2</sub>CT<sub>x</sub>.

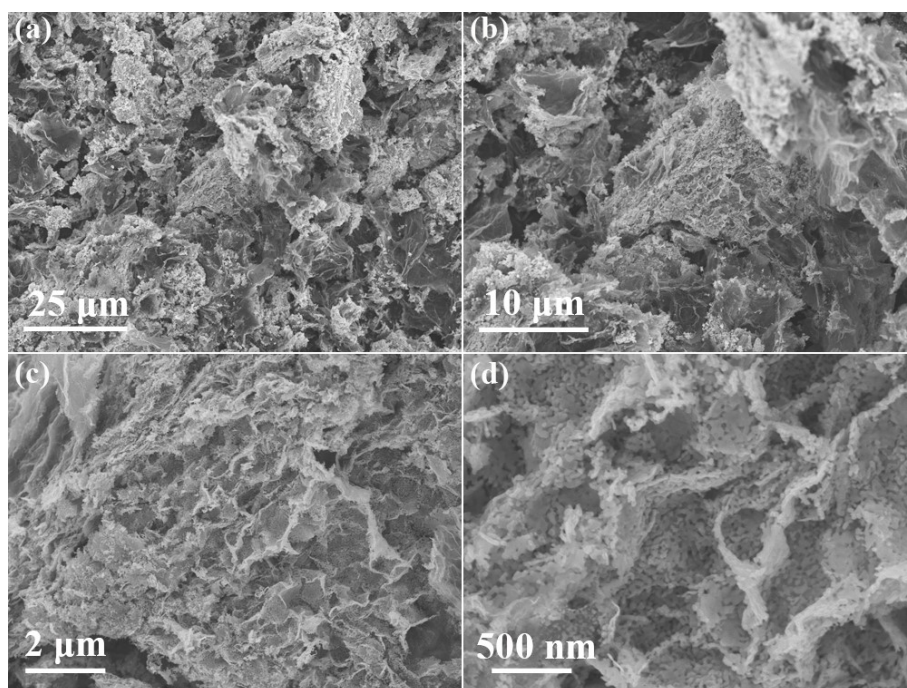

**Figure S2** Typical SEM images of Nb<sub>2</sub>O<sub>5</sub>/rGO.

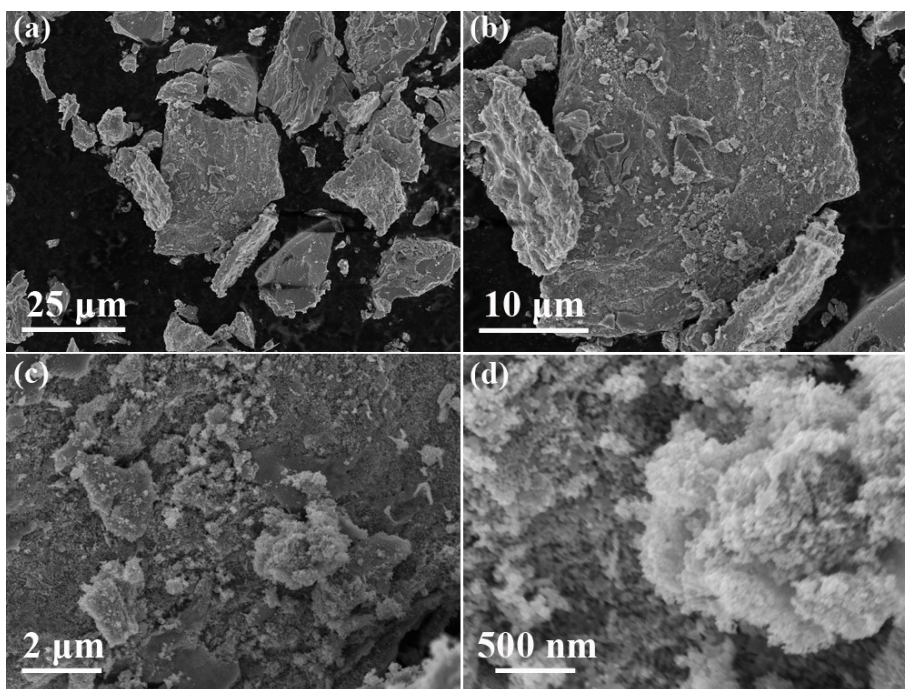

Figure S3 Typical SEM images of  $\text{Nb}_2\text{O}_5$ .

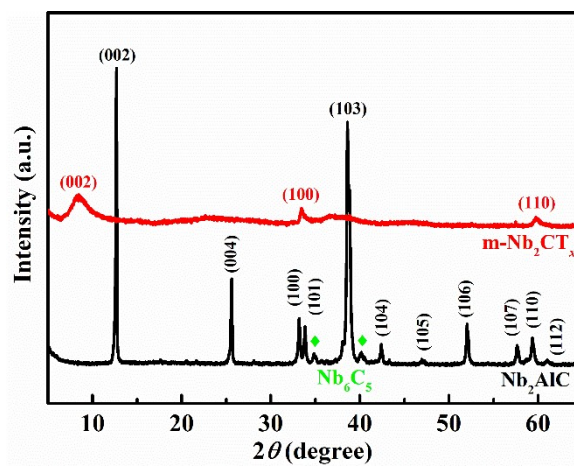

Figure S4 XRD patterns of  $\text{Nb}_2\text{AlC}$  and  $m\text{-Nb}_2\text{CT}_x$ .

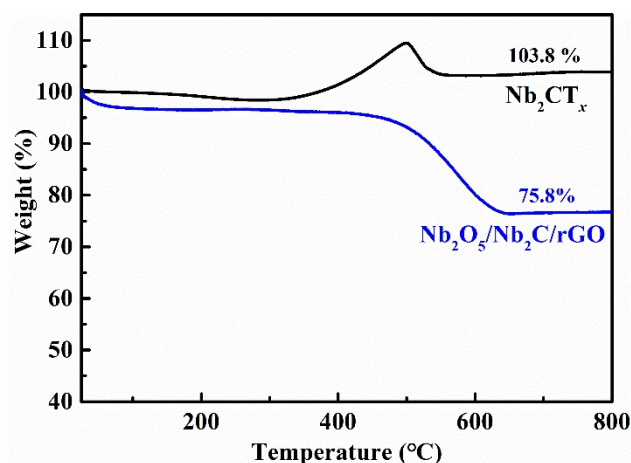

**Figure S5** TGA curves of  $\text{Nb}_2\text{CT}_x$  nanosheets and  $\text{Nb}_2\text{O}_5/\text{Nb}_2\text{C}/\text{rGO}$  aerogel.

As shown in **Fig. S5**, the final stable weights of  $\text{Nb}_2\text{CT}_x$  nanosheets and  $\text{Nb}_2\text{O}_5/\text{Nb}_2\text{C}/\text{rGO}$  are 103.8 wt% and 75.8 wt%, respectively. The weight change of pure  $\text{Nb}_2\text{CT}_x$  nanosheets is  $(103.8-100)$  wt% = +3.8 wt%. The weight change of  $\text{Nb}_2\text{O}_5/\text{Nb}_2\text{C}/\text{rGO}$  is  $(75.8-100)$  wt% = -24.2 wt%. There is no doubt that the weight change of pure rGO is -100 wt% (*i.e.*, fully oxidized/decomposed into gaseous products). Therefore, the content of rGO in  $\text{Nb}_2\text{O}_5/\text{Nb}_2\text{C}/\text{rGO}$  can be calculated based on the formula  $(1-A) \times 3.8\% - A \times 100\% = B$ , where  $A$  is the content of rGO in  $\text{Nb}_2\text{O}_5/\text{Nb}_2\text{C}/\text{rGO}$ , and  $B$  is the weight change of  $\text{Nb}_2\text{O}_5/\text{Nb}_2\text{C}/\text{rGO}$  (*i.e.*, -24.2 wt%). Hence, according to TGA results, the content of rGO in  $\text{Nb}_2\text{O}_5/\text{Nb}_2\text{C}/\text{rGO}$  sample is calculated to be 27.0 wt%.

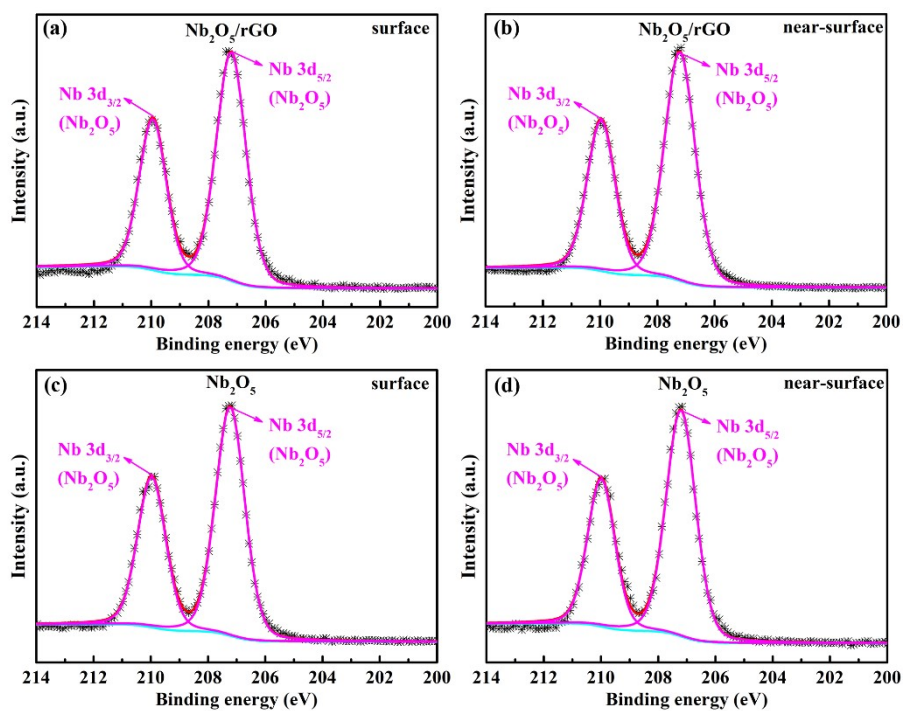

**Figure S6** Refined high-resolution Nb 3d XPS spectra of (a, b)  $\text{Nb}_2\text{O}_5/\text{rGO}$  and (c, d)  $\text{Nb}_2\text{O}_5$  before (a, c) and after (b, d)  $\text{Ar}^+$  ion sputtering.

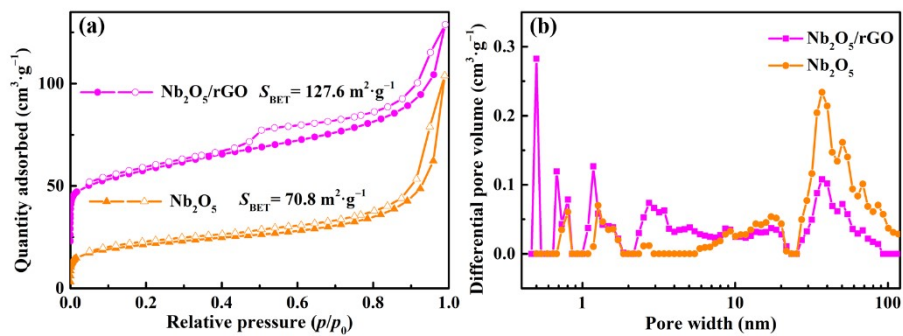

**Figure S7** (a)  $\text{N}_2$  adsorption and desorption isotherms and (b) the corresponding pore-size distribution curves of  $\text{Nb}_2\text{O}_5/\text{rGO}$  and  $\text{Nb}_2\text{O}_5$ .

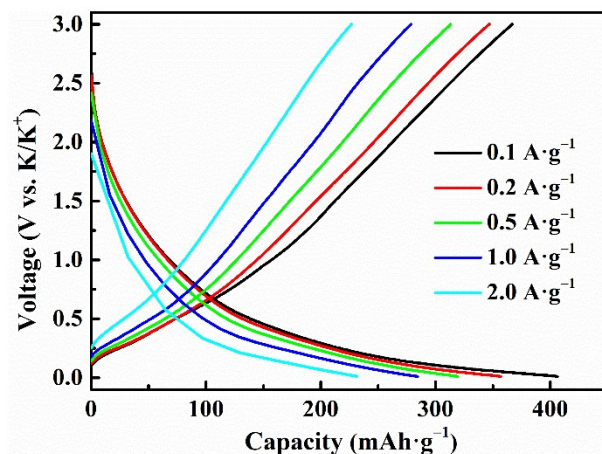

**Figure S8** GCD curves of Nb<sub>2</sub>O<sub>5</sub>/Nb<sub>2</sub>C/rGO at different current densities.

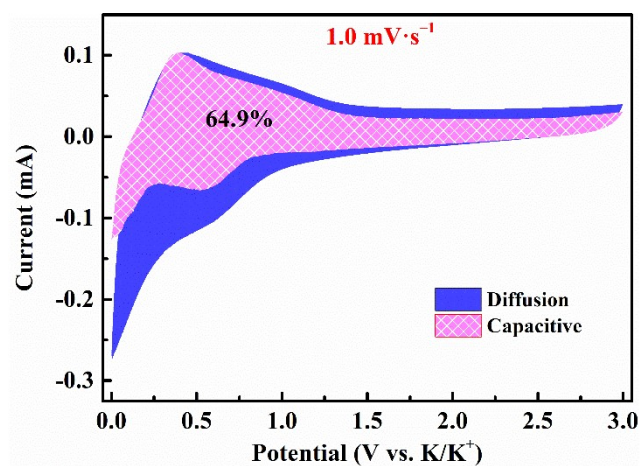

**Figure S9** Capacitive- and diffusion-controlled contributions at  $1.0 \text{ mV}\cdot\text{s}^{-1}$  for the Nb<sub>2</sub>O<sub>5</sub>/Nb<sub>2</sub>C/rGO.

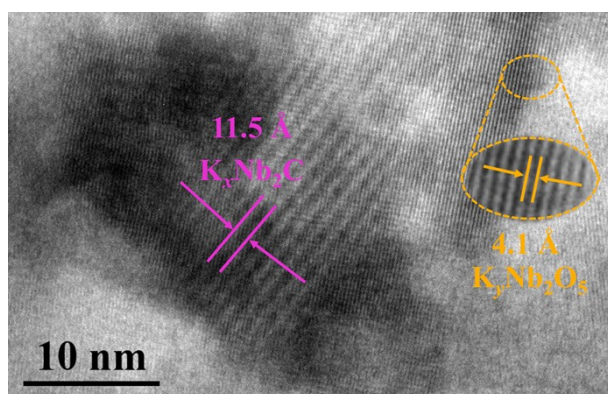

**Figure S10** HRTEM of  $\text{Nb}_2\text{O}_5/\text{Nb}_2\text{C}/\text{rGO}$  electrode after being discharged to 0.01V.

HRTEM test was performed on the electrode after being discharged to 0.01 V to confirm the evolution of structure. As shown in **Figure 2i** and **Figure S10**, it can be observed that the interlayer distance of  $\text{Nb}_2\text{C}$  is increased from 10.4 to 11.5 Å and that of  $\text{Nb}_2\text{O}_5$  is increased from 3.9 Å to 4.1 Å, indicating that  $\text{K}^+$  is successfully intercalated into  $\text{Nb}_2\text{C}$  and  $\text{Nb}_2\text{O}_5$  layers and thus the formation of  $\text{K}_x\text{Nb}_2\text{C}$  and  $\text{K}_y\text{Nb}_2\text{O}_5$ .

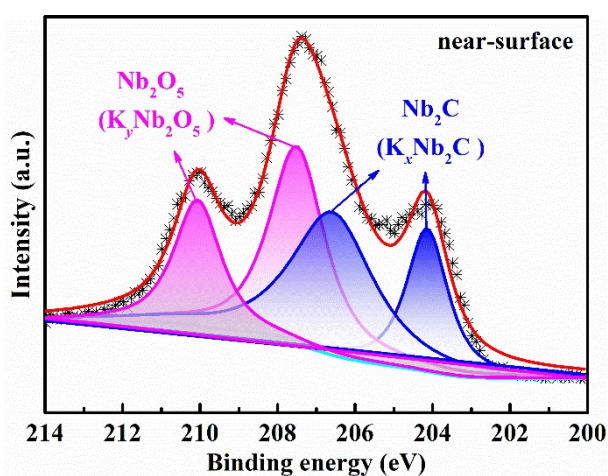

**Figure S11** Nb 3d XPS spectrum for the near-surface of  $\text{Nb}_2\text{O}_5/\text{Nb}_2\text{C}/\text{rGO}$ .

As shown in **Figure S11**, the near-surface of  $\text{Nb}_2\text{O}_5/\text{Nb}_2\text{C}/\text{rGO}$  exhibits four peaks at 210.0, 207.3, 206.4 and 204.1 eV, respectively. Combined with **Figure 5e**, the first two peaks are assigned to  $\text{Nb}_2\text{O}_5$  ( $\text{K}_y\text{Nb}_2\text{O}_5$ ), while the last two peaks can be indexed to  $\text{Nb}_2\text{C}$  ( $\text{K}_x\text{Nb}_2\text{C}$ ).

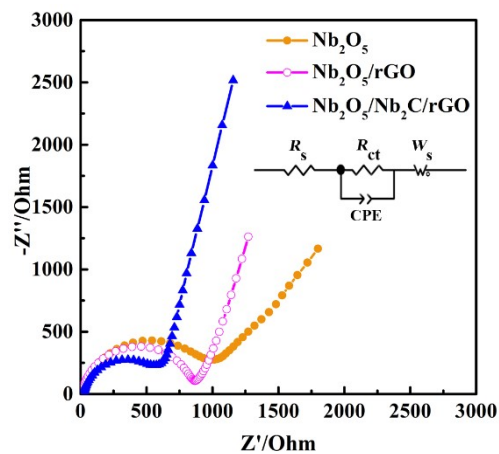

**Figure S12** EIS spectra for  $\text{Nb}_2\text{O}_5/\text{Nb}_2\text{C}/\text{rGO}$ ,  $\text{Nb}_2\text{O}_5/\text{rGO}$  and  $\text{Nb}_2\text{O}_5$ .

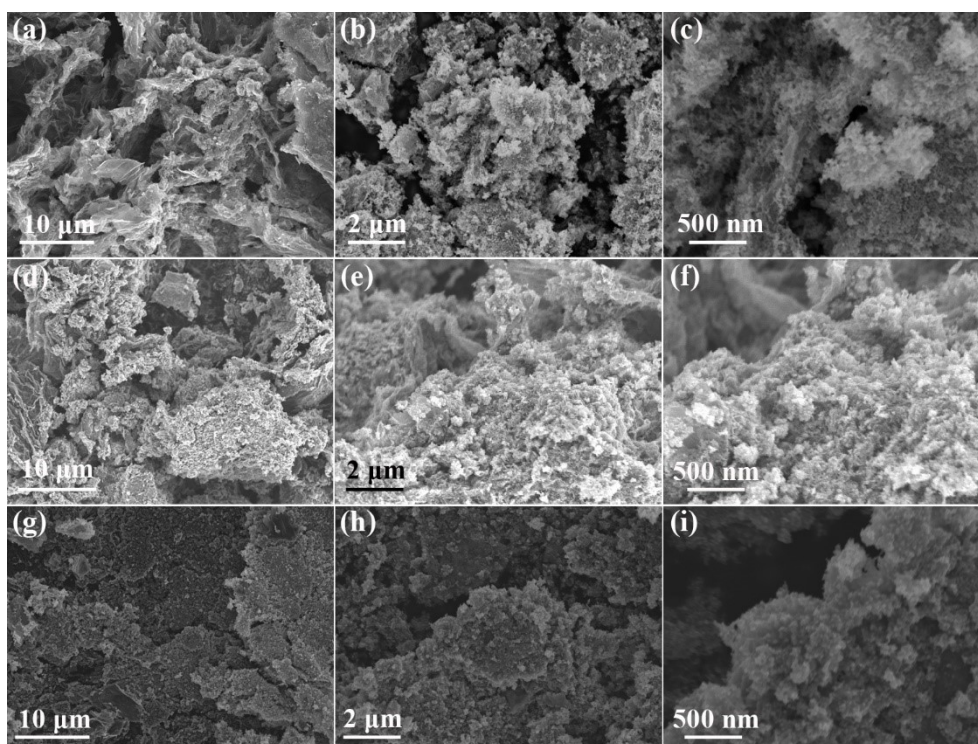

**Figure S13** SEM images of (a-c)  $\text{Nb}_2\text{O}_5/\text{Nb}_2\text{C}/\text{rGO}$ , (d-f)  $\text{Nb}_2\text{O}_5/\text{rGO}$  and (g-i)  $\text{Nb}_2\text{O}_5$  electrodes after 100 cycles at a current density of  $0.1 \text{ A} \cdot \text{g}^{-1}$ .



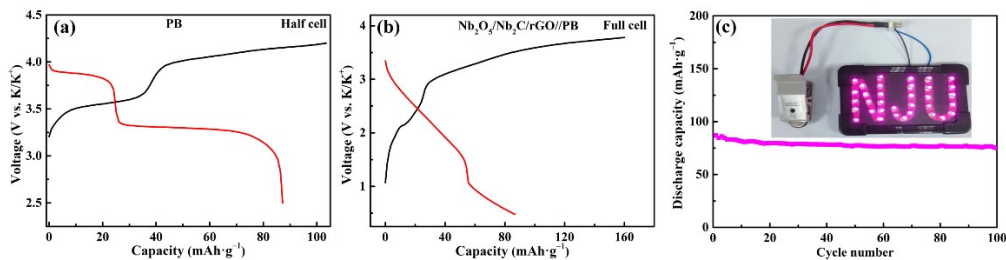

**Figure S14** GCD curves of (a) PB in half-cell and (b)  $\text{Nb}_2\text{O}_5/\text{Nb}_2\text{C}/\text{rGO}/\text{PB}$  full-cell at a current density  $0.1 \text{ A}\cdot\text{g}^{-1}$ ; (c) cycle performance of  $\text{Nb}_2\text{O}_5/\text{Nb}_2\text{C}/\text{rGO}/\text{PB}$  full-cell at a current density of  $0.1 \text{ A}\cdot\text{g}^{-1}$  (inset shows LEDs powered by the full cell).

PB was prepared by a simple precipitation method. **Figure S14a** shows the GCD curves of PB in half-cell with charge and discharge capacities of  $103.5$  and  $87.2 \text{ mAh}\cdot\text{g}^{-1}$ , respectively. Before assembling the full-cells, the charge balance between anode and cathode needs to be optimized by controlling the mass ratio of anode and cathode based on the specific discharge capacities of  $\text{Nb}_2\text{O}_5/\text{Nb}_2\text{C}/\text{rGO}$  and PB in half-cells.

**Table S1** A detailed comparison of the electrochemical performance of different anode materials for KIBs.

| Samples                                                          | Capacity ( $\text{mA}\cdot\text{g}^{-1}$ )<br>@rate ( $\text{A}\cdot\text{g}^{-1}$ ) | Capacity retention<br>@rate ( $\text{A}\cdot\text{g}^{-1}$ )@cycles | Ref.      |
|------------------------------------------------------------------|--------------------------------------------------------------------------------------|---------------------------------------------------------------------|-----------|
| Sn/rGO                                                           | 222.4 @ 0.1<br>67.1 @ 2                                                              | 69% @ 0.5 @ 500                                                     | [1]       |
| MoS <sub>2</sub> /graphene                                       | 511 @ 0.1<br>234 @ 2                                                                 | 75% @ 1 @ 800                                                       | [2]       |
| N-Doped graphene                                                 | 320 @ 0.05<br>170 @ 0.5                                                              | 88% @ 0.5 @ 500                                                     | [3]       |
| TiO <sub>x</sub> N <sub>y</sub> /C                               | 150 @ 0.2<br>75 @ 1.6                                                                | 23% @ 0.2 @ 120                                                     | [4]       |
| Onion-like carbon                                                | 245 @ 0.05<br>78 @10                                                                 | 71% @ 2 @ 980                                                       | [5]       |
| TiS <sub>2</sub>                                                 | 124 @ 0.05<br>92.1 @ 0.25                                                            | 64% @ 0.05 @ 450                                                    | [6]       |
| Co <sub>3</sub> O <sub>4</sub> -F <sub>2</sub> O <sub>3</sub> /C | 420 @ 0.05<br>278 @ 1                                                                | 60% @ 0.05 @ 100                                                    | [7]       |
| KTiOPO <sub>4</sub>                                              | 102 @ 0.005<br>50 @ 0.2                                                              | 77% @ 0.005 @ 200                                                   | [8]       |
| BiOCl                                                            | 367 @ 50<br>175 @ 1                                                                  | 58% @ 0.05 @ 50                                                     | [9]       |
| Sn <sub>4</sub> P <sub>3</sub> /MGS                              | 378 @ 0.1<br>113 @ 5                                                                 | 77% @ 0.5 @ 1000                                                    | [10]      |
| Nb <sub>2</sub> O <sub>5</sub> /Nb <sub>2</sub> C/rGO-2          | 410 @ 0.1<br>230 @ 2                                                                 | 89% @ 2 @ 1000                                                      | This work |

## References:

- [1] Wang, H.; Xing, Z.; Hu, Z.; Zhang, Y.; Hu, Y.; Sun, Y.; Ju, Z.; Zhuang, Q. Sn-based submicron-particles encapsulated in porous reduced graphene oxide network: Advanced anodes for high-rate and long life potassium-ion batteries. *Appl. Mater. Today*, **2019**, *15*, 58.
- [2] Yao, K.; Xu, Z.; Ma, M.; Li, J.; Lu, F.; Huang, J. Densified metallic MoS<sub>2</sub>/graphene enabling fast potassium-ion storage with superior gravimetric and volumetric capacities. *Adv. Funct. Mater.*, **2020**, *30*, 2001484.
- [3] Ju, Z.; Li, P.; Ma, G.; Xing, Z.; Zhuang, Q.; Qian, Y. Few layer nitrogen-doped graphene with highly reversible potassium storage. *Energy Storage Mater.*, **2018**, *11*, 38.
- [4] Tao, M.; Du, G.; Zhang, Y.; Gao, W.; Liu, D.; Luo, Y.; Jiang, J.; Bao, S.; Xu, M. TiO<sub>x</sub>N<sub>y</sub> nanoparticles/C composites derived from MXene as anode material for potassium-ion batteries. *Chem. Eng. J.*, **2019**, *369*, 828.
- [5] Chen, J.; Yang, B.; Li, H.; Ma, P.; Lang, J.; Yan, X. Candle soot: onion-like carbon,

an advanced anode material for a potassium-ion hybrid capacitor. *J. Mater. Chem. A*, **2019**, *7*, 9247.

[6] Liu, T.; Zhang, X.; Xia, M.; Yu, H.; Peng, N.; Jiang, C.; Shui, M.; Xie, Y.; Yi, T.-F.; Shu, J. Functional cation defects engineering in TiS<sub>2</sub> for high-stability anode. *Nano Energy*, **2020**, *67*, 104295.

[7] Sultana, I.; Rahman, M. M.; Mateti, S.; Ahmadabadi, V. G.; Glushenkov, A. M.; Chen, Y. K-ion and Na-ion storage performances of Co<sub>3</sub>O<sub>4</sub>-Fe<sub>2</sub>O<sub>3</sub> nanoparticle-decorated super P carbon black prepared by a ball milling process. *Nanoscale*, **2017**, *9*, 3646.

[8] Zhang, R.; Huang, J.; Deng, W.; Bao, J.; Pan, Y.; Huang, S.; Sun, C. F. Safe, Low-Cost, Fast-kinetics and low-strain inorganic-open-framework anode for potassium-ion batteries. *Angew. Chem. Int. Ed.*, **2019**, *58*, 16474.

[9] Wang, J.; Wang, B.; Lu, B. Nature of novel 2D van der Waals heterostructures for superior potassium ion batteries. *Adv. Energy Mater.*, **2020**, *10*, 2000884.

[10] Du, Y.; Yi, Z.; Chen, B.; Xu, J.; Zhang, Z.; Bao, J.; Zhou, X. Sn<sub>4</sub>P<sub>3</sub> nanoparticles confined in multilayer graphene sheets as a high-performance anode material for potassium-ion batteries. *J. Energy Chem.*, **2022**, *66*, 413.
